# Supplementary material for: Long-Term Efficacy and Impact on Mortality of Remote Magnetic Navigation Guided Catheter Ablation of Ventricular Arrhythmias
Source: MDPI journal article supplement (doi:10.3390/jcm10204695), 2021-10-13
Supplement: s1 [file s1]

**Supplementary Table 1.** Baseline characteristics of patients undergoing VA ablation (PVC compared to VT).

| Characteristics          | PVC (n = 132) | VT (n = 44)   | p-Value |
|--------------------------|---------------|---------------|---------|
| Age (years)              | 53.30 ± 15.97 | 52.49 ± 21.81 | 0.52    |
| Sex, female              | 62 (47%)      | 3 (7%)        | <0.01 * |
| BMI (kg/m <sup>2</sup> ) | 27.07 ± 4.53  | 25.64 ± 3.05  | 0.02 *  |
| LVEF (%)                 | 50.65 ± 8.28  | 40.64 ± 11.84 | <0.01 * |
| Cardiomyopathy           | 28 (21%)      | 29 (66%)      | <0.01 * |
| ICM                      | 10 (8%)       | 20 (46%)      | <0.01 * |
| DCM                      | 18 (14%)      | 8 (18%)       | 0.08    |
| Valve disease            | 27 (20%)      | 16 (36%)      | <0.01 * |
| Hypertension             | 70 (53%)      | 27 (62%)      | 0.04 *  |
| Diabetes mellitus        | 16 (12%)      | 6 (13%)       | 0.01 *  |
| Beta blocker BL          | 93 (70%)      | 31 (71%)      | 0.97    |
| AADs class I/III/IV BL   | 24 (18%)      | 31 (71%)      | <0.01 * |
| ICD                      | 10 (8%)       | 14 (32%)      | <0.01 * |
| CRT-D                    | 9 (7%)        | 15 (34%)      | <0.01 * |
| Renal failure            | 10 (8%)       | 12 (27%)      | <0.01 * |
| History of stroke        | 6 (12%)       | 5 (11%)       | 0.06    |

Continuous variables are shown as the mean ± SD and categorical variables as the number (%). VA, ventricular arrhythmias; PVC, premature ventricular contractions; VT, ventricular tachycardia; BMI, body mass index; LVEF, left ventricular ejection fraction; ICM, ischemic cardiomyopathy; DCM, dilated cardiomyopathy; BL, baseline; AADs, antiarrhythmic agents; ICD, implantable cardioverter defibrillator; CRT-D; cardiac resynchronization therapy defibrillator. \*and bold letters indicate statistical significance.

**Supplementary Table 2.** Baseline characteristics of VA patients with and without cardiomyopathies (DCM, ICM).

| Characteristics          | None (n = 119) | Cardiomyopathy (n = 57) | p-Value |
|--------------------------|----------------|-------------------------|---------|
| Age (years)              | 47.02 ± 18.19  | 63.33 ± 10.40           | <0.01 * |
| Sex, female              | 56 (47%)       | 9 (16%)                 | <0.01 * |
| BMI (kg/m <sup>2</sup> ) | 26.24 ± 4.55   | 27.47 ± 3.60            | 0.02 *  |
| LVEF (%)                 | 53.50 ± 4.06   | 39.62 ± 11.25           | <0.01 * |
| Cardiomyopathy           | 0 (0%)         | 57 (100%)               | <0.01 * |
| ICM                      | 0 (0%)         | 31 (54%)                | <0.01 * |
| DCM                      | 0 (0%)         | 26 (46%)                | <0.01 * |
| Valve disease            | 17 (14%)       | 26 (46%)                | <0.01 * |
| Hypertension             | 41 (35%)       | 57 (100%)               | <0.01 * |
| Diabetes mellitus        | 8 (7%)         | 14 (25%)                | 0.02 *  |
| Beta blocker BL          | 65 (55%)       | 57 (100%)               | <0.01 * |
| AADs class I/III/IV BL   | 20 (17%)       | 36 (63%)                | <0.01 * |
| ICD                      | 7 (6%)         | 17 (30%)                | <0.01 * |
| CRT-D                    | 0 (0%)         | 24 (42%)                | <0.01 * |
| Renal failure            | 3 (3%)         | 8 (14%)                 | 0.02 *  |
| History of stroke        | 3 (3%)         | 14 (25%)                | 0.03 *  |

Continuous variables are shown as the mean ± SD and categorical variables as the number (%). VA, ventricular arrhythmias; BMI, body mass index; LVEF, left ventricular ejection fraction; ICM, ischemic cardiomyopathy; DCM, dilated cardiomyopathy; BL, baseline; AADs, antiarrhythmic agents; ICD,

implantable cardioverter defibrillator; CRT-D; cardiac resynchronization therapy defibrillator. \*and bold letters indicate statistical significance.

**Supplementary Table 3.** Baseline characteristics of VA patients with cardiomyopathy (DCM compared to ICM).

| Characteristics          | DCM ( <i>n</i> = 26) | ICM ( <i>n</i> = 31) | <i>p</i> -Value |
|--------------------------|----------------------|----------------------|-----------------|
| Age (years)              | 62.54 ± 8.70         | 65.39 ± 9.00         | 0.34            |
| Sex, female              | 4 (15%)              | 1 (3%)               | 0.20            |
| BMI (kg/m <sup>2</sup> ) | 27.57 ± 3.67         | 27.09 ± 3.02         | 0.59            |
| LVEF (%)                 | 39.52 ± 10.68        | 35.95 ± 10.67        | 0.15            |
| Valve disease            | 11 (42%)             | 15 (48%)             | 0.28            |
| Hypertension             | 20 (77%)             | 28 (90%)             | 0.31            |
| Diabetes mellitus        | 7 (27%)              | 7 (23%)              | 0.94            |
| Beta blocker BL          | 23 (88%)             | 27 (87%)             | 1.00            |
| AADs class I/III/IV BL   | 11 (42%)             | 24 (77%)             | <b>0.01 *</b>   |
| ICD                      | 5 (19%)              | 11 (35%)             | 0.28            |
| CRT-D                    | 15 (58%)             | 9 (29%)              | <b>0.05 *</b>   |
| Renal failure            | 6 (23%)              | 14 (45%)             | 0.14            |
| History of stroke        | 1 (4%)               | 7 (23%)              | 0.09            |

Continuous variables are shown as the mean ± SD and categorical variables as the number (%). VA, ventricular arrhythmias; ICM, ischemic cardiomyopathy; DCM, dilated cardiomyopathy; BMI, body mass index; LVEF, left ventricular ejection fraction; BL, baseline; AADs, antiarrhythmic agents; ICD, implantable cardioverter defibrillator; CRT-D; cardiac resynchronization therapy defibrillator. \*and bold letters indicate statistical significance.

**Supplementary Table 4.** Baseline symptoms of VA patients.

| Symptoms     | ( <i>n</i> = 176) |
|--------------|-------------------|
| Palpitations | 126 (72%)         |
| Dizziness    | 66 (38%)          |
| Dyspnea      | 69 (39%)          |
| Syncope      | 19 (11%)          |

Categorical variables are shown as the number (%). VA, ventricular arrhythmias.
